# Supplementary material for: Distribution of genetic diversity reveals colonization patterns and philopatry of the loggerhead sea turtles across geographic scales
Source: PubMed Central journal article supplement (PMC7583243; doi:10.1038/s41598-020-74141-6), 2020-10-22

Agua Doce

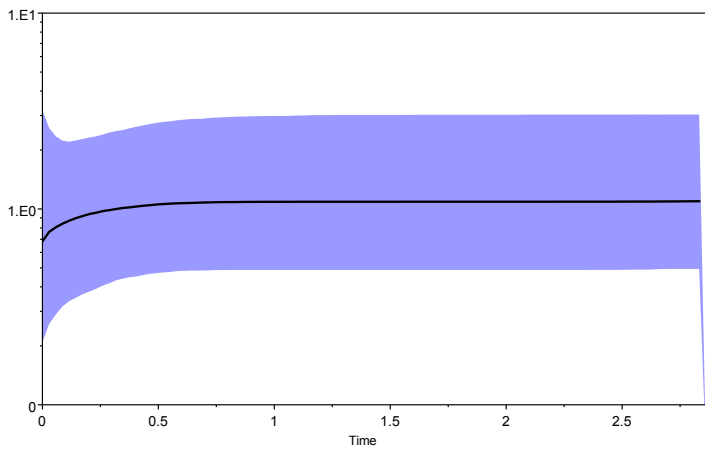

Boa Esperanca

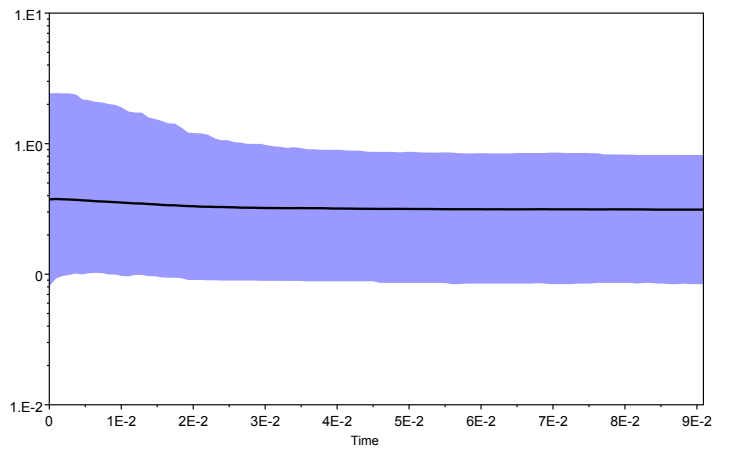

Canto

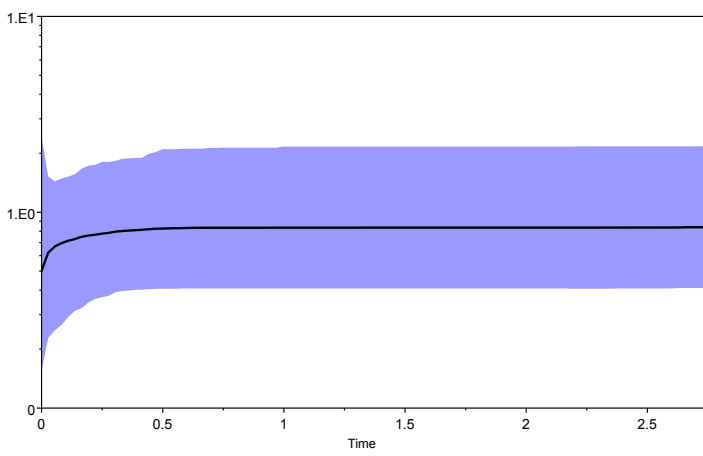

Curral Velho

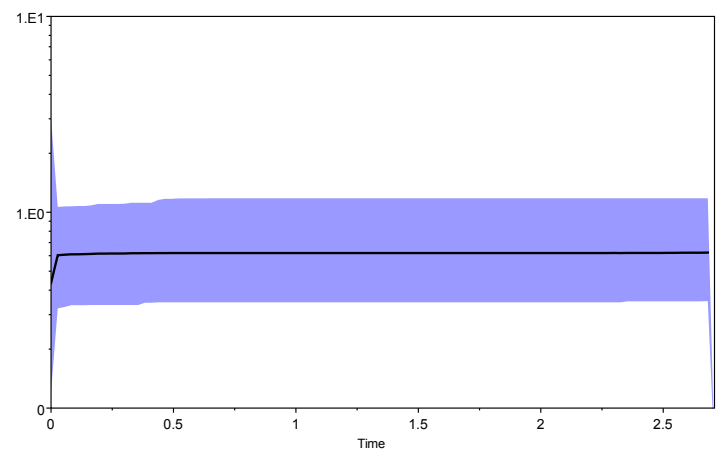

Norte

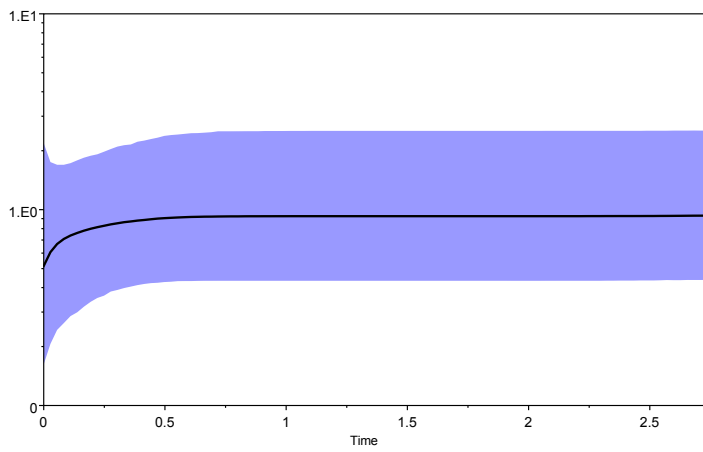

Ponta Pesqueira

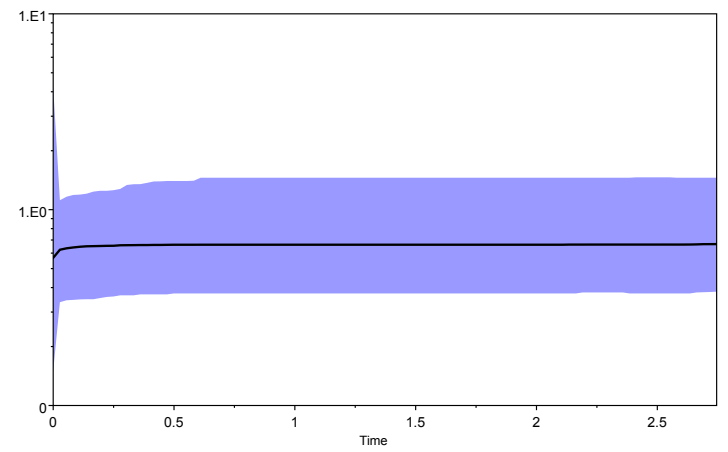

Lacacao

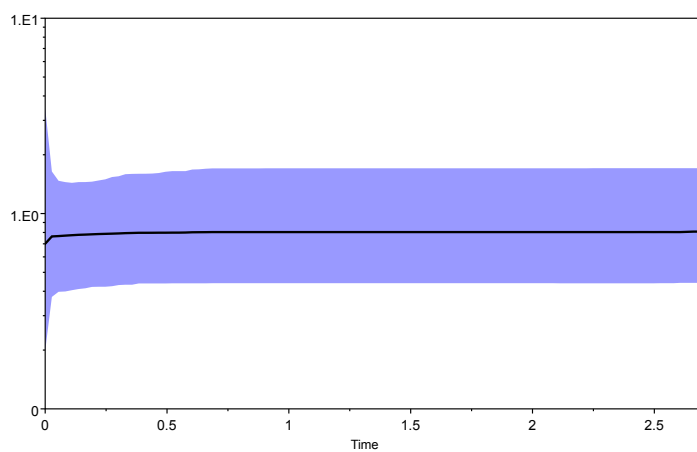

Supplement: 41598_2020_74141_MOESM8_ESM.pdf [file 41598_2020_74141_MOESM8_ESM.pdf]
